# Supplementary material for: Association between thymus density loss and efficacy in non-small cell lung cancer patients treated with immune checkpoint inhibitors
Source: PubMed Central journal article supplement — Transl Lung Cancer Res. 2024 Jul 22;13(7):1544–58. doi: 10.21037/tlcr-24-203 (PMC11304139; doi:10.21037/tlcr-24-203), 2024-07-22
Supplement: tlcr-13-07-1544-dss.pdf [file tlcr-13-07-1544-dss.pdf]

## Data Sharing Statement

|                     |                                                                                                                                                     |                                                                                                                  |
|---------------------|-----------------------------------------------------------------------------------------------------------------------------------------------------|------------------------------------------------------------------------------------------------------------------|
| <b>Article Info</b> | <a href="https://dx.doi.org/10.21037/tlcr-24-203">https://dx.doi.org/10.21037/tlcr-24-203</a>                                                       |                                                                                                                  |
| <b>Item</b>         | <b>Question</b>                                                                                                                                     | <b>Authors' Response<br/>(place "-" if not applicable)</b>                                                       |
| 1                   | Would you like to share data collected for your study to others?                                                                                    | Yes.                                                                                                             |
| 2                   | If not, would you like to share the reason for your decision?                                                                                       | -                                                                                                                |
| 3                   | What data in particular will be shared?                                                                                                             | The patients' clinic data.                                                                                       |
| 4                   | Any other documents will be shared? Such as study protocol, statistical analysis plan, informed consent form, clinical study report, analytic code. | Sure, we would like to share the study protocol, statistical analysis plan.                                      |
| 5                   | When will data availability begin?                                                                                                                  | From the publication date.                                                                                       |
| 6                   | When will data availability end?                                                                                                                    | 1 year from the publication date, since we prepare the new paper and part of the data were overlap.              |
| 7                   | To whom will you share the data?                                                                                                                    | Clinician and researcher who may interested this topic.                                                          |
| 8                   | For what type of analysis or purpose?                                                                                                               | Assisting in the assessment of prognosis in non-small cell lung adenocarcinoma patients after immunotherapy.     |
| 9                   | How or where can the data/documents be obtained?                                                                                                    | Anyone who interested could contact me by email, the address is Zhouguofeng69@126.com                            |
| 10                  | Any other restrictions?                                                                                                                             | We may balance the potential benefits and risks for each request and then provide the data that could be shared. |
